# Supplementary material
Source: publisher figshare collection journal article supplement (https://sage.figshare.com/ndownloader/files/15543101)
Supplement: Supplementary file 1 [file 15543101]

Table A 1: Data matrix for STRCMA – most recent (national and comparative sources)

| Country | L    | Arbitration A |     |     | Score L & A       | Mediation M |     |     | Conciliation C |     |     | Capabilities CA |       |      |     |      | Score M, C, CA    | Qualitative calibration |
|---------|------|---------------|-----|-----|-------------------|-------------|-----|-----|----------------|-----|-----|-----------------|-------|------|-----|------|-------------------|-------------------------|
|         | Link | Co            | Vo  | Bi  | Fuzzy calibration | Co          | Vo  | Bi  | Co             | Vo  | Bi  | Notice          | Exten | Cool | New | Aims | Fuzzy calibration | Fuzzy-score CMA         |
| DE      | 0    | 0             | 0   | 0   | 0                 | 0           | 0   | 0   | 0              | 0.2 | 0.2 | 0               | 0     | 0    | 0   | 0    | 0.16              | 0.16                    |
| AT      | 0    | 0             | 0   | 0   | 0                 | 0           | 0.4 | 0   | 0              | 0.2 | 0   | 0               | 0     | 0    | 0   | 0    | 0.32              | 0.32                    |
| CH      | 0    | 0             | 0.6 | 0.6 | 0.6               | 0.8         | 0.4 | 0.8 | 0.6            | 0.2 | 0.6 | 0               | 0     | 0    | 0   | 0    | 0.64              | 0.64                    |
| NL      | 0    | 0             | 0   | 0.2 | 0.2               | 0           | 0   | 0.2 | 0              | 0   | 0   | 0               | 0     | 0    | 0   | 0    | 0.16              | 0.2                     |
| BE      | 0    | 0             | 0   | 0   | 0                 | 0           | 0.4 | 0.8 | 0              | 0   | 0   | 1               | 0     | 0    | 0   | 0    | 0.68              | 0.68                    |
| LU      | 0    | 0             | 0.6 | 0   | 0.6               | 0.8         | 0   | 0   | 0              | 0   | 0   | 0               | 0     | 1    | 0   | 0    | 0.68              | 0.68                    |
| FR      | 0    | 0             | 0.4 | 0   | 0.4               | 0           | 0.4 | 0.4 | 0              | 0.2 | 0.4 | 0               | 0     | 0    | 0   | 0    | 0.32              | 0.4                     |
| IT      | 0    | 0             | 0.6 | 0   | 0.6               | 0.8         | 0.4 | 0.8 | 0              | 0   | 0   | 0               | 0     | 1    | 0   | 0    | 0.68              | 0.68                    |
| EL      | 0    | 0.8           | 0   | 0   | 0.8               | 0           | 0.4 | 0   | 0              | 0   | 0   | 0               | 1     | 0    | 0   | 0    | 0.36              | 0.8                     |
| PT      | 0    | 0.8           | 0.6 | 0   | 0.8               | 0.8         | 0   | 0   | 0              | 0   | 0   | 0               | 0     | 0    | 0   | 0    | 0.64              | 0.8                     |
| ES      | 0    | 0             | 0.6 | 0.8 | 0.8               | 0.8         | 0.4 | 0   | 0              | 0   | 0   | 0               | 0     | 0    | 0   | 0    | 0.64              | 1                       |
| GB      | 0    | 0             | 0.2 | 0   | 0.2               | 0           | 0.2 | 0.2 | 0              | 0.2 | 0.2 | 0               | 0     | 0    | 0   | 0    | 0.16              | 0.2                     |
| IE      | 0    | 0             | 0.4 | 0   | 0.4               | 0           | 0.4 | 0   | 0              | 0   | 0   | 0               | 0     | 0    | 0   | 0    | 0.32              | 0.4                     |
| SE      | 0    | 0             | 0   | 0   | 0                 | 0.8         | 0.4 | 0.8 | 0.6            | 0   | 0   | 1               | 1     | 0    | 0   | 1    | 0.76              | 0.76                    |
| DK      | 1    | 0             | 0   | 0   | 1                 | 0.8         | 0.4 | 0   | 0.6            | 0   | 0   | 1               | 1     | 1    | 1   | 0    | 0.8               | 1                       |
| FI      | 0    | 0             | 0   | 0   | 0                 | 0.8         | 0   | 0   | 0              | 0   | 0   | 1               | 1     | 0    | 0   | 0    | 0.72              | 0.72                    |
| NO      | 0    | 1             | 0   | 0   | 1                 | 0.8         | 0   | 0   | 0              | 0   | 0   | 1               | 1     | 0    | 0   | 0    | 0.72              | 1                       |

Co = Compulsory Statutory; Vo = Voluntary Statutory; Bi = Bilateral arrangements (typically voluntary by default as agreement on arrangement can be broken) – bargaining coverage considered; Notice = Notice obligation before industrial action; Exten = Extension of period for mediation and conciliation

before industrial action; Cool = Cool-down period; New = New mediation/conciliation during industrial action; Aims = Independent aims for mediation/arbitration or based on aims of parties; L = linkage of different bargaining areas into a single decision.

Calibration of CMA provisions is based on six-level fuzzy scores. Cell indicates max fuzzy score for CMA provisions – qualitative judgment of scores based on existence of arbitration, mediation and conciliation and their capabilities based on country analysis/reports (see sources).

Fuzzy-set score is found by the union of scores for arbitration (L+A) OR mediation/conciliation with capabilities (M+C). This way the strongest link prevails in the score. Finally, the qualitative calibration adjusts for 'dead letter' institutions and the actual practice of CMA based on qualitative national resources.

Sources for CMA calibration: Comparative overview: (EIRO, 2006; Valdés Dal-Ré, 2003; Jacobs, 1993b). National sources: Germany (Dribbush and Stettes, 2006; EIRO, 2006; Jacobs, 1993a; Zachert, 2003), Austria (EIRO, 2006; Jacobs, 1993a; Marhold, 2003; Strohmer, 2006), Switzerland (Jacobs, 1993a; Fluder and Hotz-Hart, 1998), Netherlands (de Roo, 2003b; EIRO, 2006; Jacobs, 1993a; van het Kaar, 2006), Belgium (Chaidron, 2006; Delattre, 2003; EIRO, 2006; Jacobs, 1993a), Luxembourg (de Roo, 2003a; EIRO, 2006; Jacobs, 1993a), France (EIRO, 2006; Jacobs, 1993a; Jeammaud, 2003; Pernot and Vincent, 2006), Italy (EIRO, 2006; Jacobs, 1993a; Grandi, 2003; Senatori, 2006), Greece (EIRO, 2006; Jacobs, 1993a; Karkioulafis, 2006; Yannakourou and Koukoules, 2003), Portugal (EIRO, 2006; Jacobs, 1993a; Monteiro Fernandes, 2003), Spain (Amorós, 2006; EIRO, 2006; Jacobs, 1993a; Rodríguez Fernández, 2003), Great Britain (Dickens, 2006; EIRO, 2006; Jacobs, 1993a; Kilpatrick, 2003), Ireland (Dobbins, 2006; EIRO, 2006; Jacobs, 1993a; Kerr, 2003), Sweden (Berg, 2006; EIRO, 2006; Jacobs, 1993a; Eriksson, 2003; Stokke, 2002), Denmark (Due et al., 1993; EIRO, 2006; Jacobs, 1993a; Jørgensen, 2006; Kristiansen, 2003), Finland (EIRO, 2006; Jacobs, 1993a; Kuusisto, 2006; Saloni, 2003) and Norway (EIRO, 2006; Jacobs, 1993a; Stokke, 1998; Stokke, 2002; Stokke, 2006).

Notes on the calibration:

Fuzzy-set score is found by the union of scores for arbitration (L+A) OR mediation/conciliation with capabilities (M, C and CA). This way the strongest link prevails in the score. Arbitration is the stronger form and should give high membership score in Strong CMA, i.e. above 0.5. However, voluntary arbitration is just above 0.5 as parties can always decline. Mediation is stronger than conciliation due to the possibility of proposed settlement by mediator. Compulsory mediation is a strong intervention 0.8 as it will force parties to consider a settlement beyond their immediate control. Voluntary mediation is however weak (0.4) as parties can turn it down. Conciliation is the weaker form but when it's compulsory it is still a member of strong CMA (0.6). Depending on capabilities, this can change upwards or downwards.

The capabilities to require notice, extend, cool down, new mediation round and when it is biased should increase set-membership but only with a maximum of 0.2 and a minimum of 0. M, C, CA is found as the average of MIN of M and C (weight 4/5) + Capabilities (weight 1/5).

Table A 2: Data matrix for LGOVCAP – averages for two decades preceding and following important CMA-reform (Visser, 2015)

| Country | CENT (average) | Cfveto (average) | Unveto (average) | Centralisation score | Wcoord (average) | fscentralisa              | fswcoord                  | Fuzzy-score LGOVCAP        |
|---------|----------------|------------------|------------------|----------------------|------------------|---------------------------|---------------------------|----------------------------|
| DE      | 0.433          | 0                | 2                | 0.46                 | 3.6              | 0.81                      | 0.16                      | 0.59                       |
| AT      | 0.964          | 2                | 2                | 0.98                 | 5                | 0                         | 0.02                      | 0.01                       |
| CH      | 0.329          | 0                | 1.6              | 0.35                 | 3.57             | 0.92                      | 0.17                      | 0.67                       |
| NL      | 0.539          | 1.2              | 2                | 0.63                 | 3.88             | 0.4                       | 0.11                      | 0.3                        |
| BE      | 0.494          | 1                | 1                | 0.50                 | 4                | 0.74                      | 0.1                       | 0.53                       |
| LU      | 0.337          | 1                | 1                | 0.39                 | 2                | 0.89                      | 0.82                      | 0.87                       |
| FR      | 0.227          | 0                | 0                | 0.15                 | 2.15             | 0.99                      | 0.74                      | 0.91                       |
| IT      | 0.358          | 0.85             | 0.85             | 0.38                 | 2.9              | 0.9                       | 0.35                      | 0.72                       |
| EL      | 0.331          | 0                | 0                | 0.22                 | 4                | 0.98                      | 0.1                       | 0.69                       |
| PT      | 0.306          | 0                | 0                | 0.20                 | 3.2              | 0.98                      | 0.26                      | 0.74                       |
| ES      | 0.3            | 1                | 0                | 0.28                 | 2.65             | 0.96                      | 0.44                      | 0.79                       |
| GB      | 0.372          | 0                | 0                | 0.25                 | 3.15             | 0.97                      | 0.27                      | 0.74                       |
| IE      | 0.5            | 0.65             | 0                | 0.39                 | 4.8              | 0.89                      | 0.03                      | 0.6                        |
| SE      | 0.517          | 1.65             | 2                | 0.65                 | 3.8              | 0.32                      | 0.12                      | 0.25                       |
| DK      | 0.6            | 0                | 0                | 0.40                 | 5                | 0.88                      | 0.02                      | 0.59                       |
| FI      | 0.427          | 1                | 1                | 0.45                 | 4.3              | 0.82                      | 0.06                      | 0.57                       |
| NO      | 0.649          | 2                | 2                | 0.77                 | 4.8              | 0.08                      | 0.03                      | 0.06                       |
|         |                |                  |                  |                      |                  | Thresholds: 0.3; 0.6; 0.8 | Thresholds: 1.5; 2.5; 4.5 | fscentralisa/fswcoord: 2/3 |

CENT: Summary measure of centralisation of wage bargaining, taking into account both union authority and union concentration at multiple levels (derived from Iversen's centralisation index).  $(0-1) = \sqrt{[(\text{Cfauthority} * \text{DEME} * \text{Hcf}) + (\text{Affauthority} * \text{DEMI} * \text{Haff})]}$ , weighting the degree of authority or vertical coordination in the union movement with the degree of external and internal unity, and union concentration or horizontal coordination, taking into account multiple levels at which bargaining can take place and assuming a non-zero division of union authority over different levels (Visser, 2011a). Taking the square root serves to magnify the differences at the low end of this scale (cf. Iversen, 1999: 53).

Weighted with Cfveto (confederate veto on strike decisions) and Unveto (federate veto on strike decisions at company level). Weight in Centralisation score: CENT = 2/3, Cfveto+Unveto: 1/3.

Wcoord: 5 = economy-wide bargaining, based on a) enforceable agreements between the central organisations of unions and employers affecting the entire economy or entire private sector, or on b) government imposition of a wage schedule, freeze, or ceiling. 4 = mixed industry and economy-wide bargaining: a) central organisations negotiate non-enforceable central agreements (guidelines) and/or b) key unions and employers' associations set pattern for the entire economy. 3 = industry bargaining with no or irregular pattern setting, limited involvement of central organisations, and limited freedoms for company bargaining. 2 = mixed or alternating industry- and firm-level bargaining, with weak enforceability of industry agreements. 1 = none of the above, fragmented bargaining, mostly at company level (Visser, 2011a).

Fuzzy scores for each measure are calibrated using thresholds: [0.8; 0.6; 0.3] for Centralisation and [4.5; 2.5; 1.5] for Wcoord. Composite score 'fscentralisa/fswcoord' is calculated with a 2/3 weight to fscentralisation.

Table A 3: Data matrix for STRUN – averages for two decades preceding and following important CMA-reform (Visser, 2016)

| Country | Bargaining coverage | Union density | Calibration of Bargaining coverage | Calibration of Union density | Fuzzy-score STRUN                         |
|---------|---------------------|---------------|------------------------------------|------------------------------|-------------------------------------------|
| DE      | 80                  | 33.78         | 0.89                               | 0.28                         | 0.74                                      |
| AT      | 95                  | 64            | 0.97                               | 0.97                         | 0.97                                      |
| CH      | 46.78               | 21.91         | 0.35                               | 0.06                         | 0.28                                      |
| NL      | 76.62               | 26.51         | 0.86                               | 0.12                         | 0.68                                      |
| BE      | 80                  | 38.53         | 0.89                               | 0.45                         | 0.78                                      |
| LU      | 60                  | 43.67         | 0.61                               | 0.63                         | 0.62                                      |
| FR      | 75.2                | 17.05         | 0.85                               | 0.03                         | 0.65                                      |
| IT      | 78.5                | 36.37         | 0.88                               | 0.37                         | 0.75                                      |
| EL      | 85                  | 34.31         | 0.93                               | 0.3                          | 0.77                                      |
| PT      | 73.87               | 37.62         | 0.83                               | 0.41                         | 0.73                                      |
| ES      | 85.29               | 15.14         | 0.93                               | 0.02                         | 0.7                                       |
| GB      | 40.59               | 32.45         | 0.25                               | 0.24                         | 0.25                                      |
| IE      | 30.5                | 31.14         | 0.14                               | 0.21                         | 0.16                                      |
| SE      | 89                  | 78.7          | 0.95                               | 1                            | 0.96                                      |
| DK      | 67.5                | 57.56         | 0.74                               | 0.93                         | 0.79                                      |
| FI      | 76.75               | 70.68         | 0.87                               | 0.99                         | 0.9                                       |
| NO      | 65                  | 59.52         | 0.7                                | 0.95                         | 0.76                                      |
|         |                     |               | Thresholds:<br>90; 55; 15          | Thresholds:<br>60; 40; 20    | Weight coverage 3/4<br>Weight density 1/4 |

AdjCov: Bargaining (or Union) Coverage, adjusted (0–100) = employees covered by wage bargaining agreements as a proportion of all wage and salary earners in employment with the right to bargaining, expressed as percentage, adjusted for the possibility that some sectors or occupations are excluded from the right to bargain (removing such groups from the employment count before dividing the number of covered employees over the total number of dependent workers in employment) (Visser, 2011a).

CovPriv: Bargaining (or Union) Coverage, private or market sector (0–100) = employees in the private or market sector covered by wage bargaining agreements as a proportion of all wage and salary earners in employment in the private or market sector (Visser, 2011a).

Thresholds for fscov: [90; 55; 15]. UD: Union Density rate, net union membership as a proportion of all wage and salary earners in employment (Visser, 2011a).

UDpriv: Union Density rate, net union membership as a proportion of all wage and salary earners in private employment (where available) (Visser, 2011a). Calibration of 'fsdensity' using thresholds: [60; 40; 20]. Weight coverage vs. density: 3/4 vs. 1/4

Table A 4: Data matrix for LREGIND – most recent (national and comparative sources)

| Country | bloc-<br>kade | boy-<br>cott | go<br>slow | work to<br>rule | pick-<br>eting | poli-<br>tical | sympathy | warning | Immunity<br>system | Actions<br>composite score | Peace | <10 days<br>= 1 | Ballot | Procedural<br>rules score | Fuzzy-score<br>REGIND                       |
|---------|---------------|--------------|------------|-----------------|----------------|----------------|----------|---------|--------------------|----------------------------|-------|-----------------|--------|---------------------------|---------------------------------------------|
| DE      | 0             | 0            | 1          | 1               | 1              | 0              | 0.5      | 1       | -                  | 0.44                       | 1     | 0               | 1      | 0.67                      | 0.61                                        |
| AT      | 0             | 0            | 0          | 0               | 0              | 0              | 0        | 0       | -                  | 1                          | 1.5   | 0               | 0      | 0.5                       | 0.63                                        |
| CH      | 0             | 0            | 0          | 0               | 0              | 0              | 0        | 0       | -                  | 1                          | 2     | 0               | 0      | 0.67                      | 0.75                                        |
| NL      | 1             | 1            | 1          | 1               | 0              | 0              | 0        | 0       | -                  | 0.5                        | 1     | 0               | 1      | 0.67                      | 0.63                                        |
| BE      | 0             | 0            | 0          | 0               | 1              | 0.5            | 1        | 0       | -                  | 0.69                       | 0     | 0               | 0      | 0                         | 0.17                                        |
| LU      | 0             | 0            | 1          | 1               | 1              | 0              | 0        | 0       | -                  | 0.63                       | 1     | 0               | 0      | 0.33                      | 0.41                                        |
| FR      | 0             | 0            | 0          | 0               | 0              | 0              | 1        | 0       | -                  | 0.88                       | 0     | 0               | 0      | 0                         | 0.22                                        |
| IT      | 0             | 0            | 0          | 0               | 1              | 1              | 0.5      | 0       | -                  | 0.69                       | 0.5   | 0               | 0      | 0.17                      | 0.30                                        |
| EL      | 0             | 0            | 1          | 1               | 0              | 0              | 1        | 0       | -                  | 0.63                       | 0     | 0               | 0      | 0                         | 0.16                                        |
| PT      | 0             | 1            | 1          | 0               | 1              | 0              | 1        | 0       | -                  | 0.5                        | 0     | 0.8             | 0      | 0.27                      | 0.33                                        |
| ES      | 0             | 0            | 0          | 0               | 0              | 0              | 0.5      | 0       | -                  | 0.94                       | 0     | 0.8             | 0      | 0.27                      | 0.43                                        |
| GB      | 0             | 0            | 1          | 1               | 1              | 0              | 0        | 0       | 0                  | 0.67                       | 0     | 1               | 1      | 0.67                      | 0.67                                        |
| IE      | 0             | 0            | 1          | 1               | 1              | 1              | 1        | 0       | 0                  | 0.44                       | 0     | 0.8             | 1      | 0.6                       | 0.56                                        |
| SE      | 1             | 1            | 1          | 1               | 0              | 0              | 1        | 0       | -                  | 0.38                       | 0.6   | 0.8             | 0      | 0.47                      | 0.44                                        |
| DK      | 1             | 1            | 0          | 0               | 1              | 0.5            | 1        | 0       | -                  | 0.44                       | 0.8   | 1               | 1      | 0.93                      | 0.81                                        |
| FI      | 1             | 0            | 1          | 1               | 0              | 1              | 1        | 0       | -                  | 0.38                       | 1     | 1               | 0      | 0.67                      | 0.59                                        |
| NO      | 1             | 1            | 1          | 0               | 1              | 1              | 1        | 0       | -                  | 0.25                       | 1     | 0.8             | 1      | 0.93                      | 0.76                                        |
|         |               |              |            |                 |                |                |          |         |                    |                            |       |                 |        |                           | Weight<br>procedural<br>rules score:<br>3/4 |

Note high score = restrictive. 'Action composite score': unweighted average. 'Procedural rules score': unweighted average. 'fsregulation': weighted average score of 'action composite score' and 'procedural rules score'. 'Procedural rules score': weight 3/4.

Sources for calibration of regulation of engaging in industrial action: Comparative overview: (Warneck, 2007). National sources: Germany (Dribbush and Stettes, 2006; EIRO, 2006; Jacobs, 1993a; Zachert, 2003), Austria (EIRO, 2006; Jacobs, 1993a; Marhold, 2003; Strohmer, 2006), Switzerland (Jacobs, 1993a; Fluder and Hotz-Hart, 1998), Netherlands (de Roo, 2003b; EIRO, 2006; Jacobs, 1993a; van het Kaar, 2006), Belgium (Chaidron, 2006; Delattre, 2003; EIRO, 2006; Jacobs, 1993a), Luxembourg (de Roo, 2003a; EIRO, 2006; Jacobs, 1993a), France (EIRO, 2006; Jacobs, 1993a; Jeammaud, 2003; Pernot and Vincent, 2006), Italy (EIRO, 2006; Jacobs, 1993a; Grandi, 2003; Senatori, 2006), Greece (EIRO, 2006; Jacobs, 1993a; Karkioulafis, 2006; Yannakourou and Koukoules, 2003), Portugal (EIRO, 2006; Jacobs, 1993a; Monteiro Fernandes, 2003), Spain (Amorós, 2006; EIRO, 2006; Jacobs, 1993a; Rodríguez Fernández, 2003), Great Britain (Dickens, 2006; EIRO, 2006; Jacobs, 1993a; Kilpatrick, 2003), Ireland (Dobbins, 2006; EIRO, 2006; Jacobs, 1993a; Kerr, 2003), Sweden (Berg, 2006; EIRO, 2006; Jacobs, 1993a; Eriksson, 2003; Stokke, 2002), Denmark (Due et al., 1993; EIRO, 2006; Jacobs, 1993a; Jørgensen, 2006; Kristiansen, 2003), Finland (EIRO, 2006; Jacobs, 1993a; Kuusisto, 2006; Salenius, 2003) and Norway (EIRO, 2006; Jacobs, 1993a; Stokke, 1998; Stokke, 2002; Stokke, 2006).



Table A 5: Data matrix for CIVCOURT – most recent (national and comparative sources)

|    | No specialised labour court | No lay judges | Fuzzy score |
|----|-----------------------------|---------------|-------------|
| DE | 0.2                         | 0.2           | 0           |
| AT | 1                           | 0.2           | 0.8         |
| CH | 0.4                         | 0.2           | 0.2         |
| NL | 1                           | 0             | 1           |
| BE | 0.6                         | 0.2           | 0.4         |
| LU | 0.2                         | 0             | 0.2         |
| FR | 0.2                         | 0.2           | 0           |
| IT | 0.6                         | 0             | 0.6         |
| EL | 1                           | 0             | 1           |
| PT | 0.8                         | 0             | 0.8         |
| ES | 0.6                         | 0             | 0.6         |
| GB | 0.2                         | 0.2           | 0           |
| IE | 0.2                         | 0.2           | 0           |
| SE | 0.2                         | 0.2           | 0           |
| DK | 0.2                         | 0.2           | 0           |
| FI | 0.2                         | 0.2           | 0           |
| NO | 0.2                         | 0.2           | 0           |

Calibration: 1 = no specialised court; 0.6 = Integrated; 0 = Yes, specialised

Judges: 0.2 = Lay judges; 0 = No lay judge (added to the court score)

Sources for calibration of court system: Sources for CMA calibration: Comparative overview: (EIRO, 2013; EALCJ, 2013). National sources: Germany (Dribbush and Stettes, 2006; EIRO, 2006; Jacobs, 1993a; Zachert, 2003), Austria (EIRO, 2006; Jacobs, 1993a; Marhold, 2003; Strohmer, 2006), Switzerland (Jacobs, 1993a; Fluder and Hotz-Hart, 1998), Netherlands (de Roo, 2003b; EIRO, 2006; Jacobs, 1993a; van het Kaar, 2006), Belgium (Chaidron, 2006;

Delattre, 2003; EIRO, 2006; Jacobs, 1993a), Luxembourg (de Roo, 2003a; EIRO, 2006; Jacobs, 1993a), France (EIRO, 2006; Jacobs, 1993a; Jeammaud, 2003; Pernot and Vincent, 2006), Italy (EIRO, 2006; Jacobs, 1993a; Grandi, 2003; Senatori, 2006), Greece (EIRO, 2006; Jacobs, 1993a; Karkioulafis, 2006; Yannakourou and Koukoules, 2003), Portugal (EIRO, 2006; Jacobs, 1993a; Monteiro Fernandes, 2003), Spain (Amorós, 2006; EIRO, 2006; Jacobs, 1993a; Rodríguez Fernández, 2003), Great Britain (Dickens, 2006; EIRO, 2006; Jacobs, 1993a; Kilpatrick, 2003), Ireland (Dobbins, 2006; EIRO, 2006; Jacobs, 1993a; Kerr, 2003), Sweden (Berg, 2006; EIRO, 2006; Jacobs, 1993a; Eriksson, 2003; Stokke, 2002), Denmark (Due et al., 1993; EIRO, 2006; Jacobs, 1993a; Jørgensen, 2006; Kristiansen, 2003), Finland (EIRO, 2006; Jacobs, 1993a; Kuusisto, 2006; Salenius, 2003) and Norway (EIRO, 2006; Jacobs, 1993a; Stokke, 1998; Stokke, 2002; Stokke, 2006).

Table A 6: Decade for Most Recent Reforms and Data Used

|    | <b>Decade for Most Recent Reform</b> | <b>Data Used for LGOVCAP &amp; STRUN</b> |
|----|--------------------------------------|------------------------------------------|
| DE | 1950s                                | 1960s                                    |
| AT | 1970s                                | 1960s-1970s                              |
| CH | N/A (Bilateral Agreements)           | 1960s-2010s                              |
| NL | N/A (Bilateral Agreements)           | 1960s-2010s                              |
| BE | 1960s                                | 1960s                                    |
| LU | 1960s                                | 1990s (closest decade with data)         |
| FR | 1980s                                | 1970s-1980s                              |
| IT | 1990s/2000s                          | 1990s-2000s                              |
| EL | 1990s                                | 1980s-1990s                              |
| PT | 1990s                                | 1980s-1990s                              |
| ES | 1990s                                | 1980s-1990s                              |
| GB | 1980s-1990s                          | 1980s-1990s                              |
| IE | 1990s/2000s (dating back to 1940s)   | 1990s-2000s                              |
| SE | 2000s (dating back to 1930s)         | 1990s-2000s                              |
| DK | 1930s (dating back 1910s)            | 1960s (closest decade with data)         |
| FI | 1990s (dating back to 1960s)         | 1980s-1990s                              |
| NO | 1910s                                | 1960s (closest decade with data)         |

Table A 7: Thresholds for calibration

| <b>Outcome</b>                           | <b>Fully out of set</b>                                                                                                                                                                                                                                                  | <b>Neither in nor out</b>                                                                                                                                                                                                                                                                                                                                                                           | <b>Fully in</b>                                                                                                                                                                                                                                               | <b>Calibration Procedure</b>                                                                                                                                                                                                                                                                                                                                                                                                                                                                                                                                                                                                                                                   |
|------------------------------------------|--------------------------------------------------------------------------------------------------------------------------------------------------------------------------------------------------------------------------------------------------------------------------|-----------------------------------------------------------------------------------------------------------------------------------------------------------------------------------------------------------------------------------------------------------------------------------------------------------------------------------------------------------------------------------------------------|---------------------------------------------------------------------------------------------------------------------------------------------------------------------------------------------------------------------------------------------------------------|--------------------------------------------------------------------------------------------------------------------------------------------------------------------------------------------------------------------------------------------------------------------------------------------------------------------------------------------------------------------------------------------------------------------------------------------------------------------------------------------------------------------------------------------------------------------------------------------------------------------------------------------------------------------------------|
| <i>Strong CMA (STRCMA)</i>               | If no CMA exist at all.                                                                                                                                                                                                                                                  | If countries have voluntary mediation together with medium strong capabilities                                                                                                                                                                                                                                                                                                                      | If countries have compulsory arbitration or non-voluntary mediation with maximum strong capabilities                                                                                                                                                          | <i>Qualitative assessment of formal procedures and capabilities for conciliation, mediation or arbitration</i>                                                                                                                                                                                                                                                                                                                                                                                                                                                                                                                                                                 |
| <b>Conditions</b>                        | <b>Fully out of set</b>                                                                                                                                                                                                                                                  | <b>Neither in nor out</b>                                                                                                                                                                                                                                                                                                                                                                           | <b>Fully in</b>                                                                                                                                                                                                                                               |                                                                                                                                                                                                                                                                                                                                                                                                                                                                                                                                                                                                                                                                                |
| <i>Low Governance Capacity (LGOVCAP)</i> | <p>Wage coordination (scale from 1 to 5): 4.5 is considered fully out of the set of uncoordinated union movements</p> <p>Centralisation (scale from 0-1): 0.8 or over is considered fully out of the set of highly fragmented union movements. Veto powers included.</p> | <p>Wage coordination (scale from 1 to 5): 2.5 is considered neither in or out of the set of uncoordinated union movements</p> <p>Centralisation (scale from 0-1): 0.6 is considered neither in or out of the set of fragmented union movements. Veto powers included.</p> <p>Full fuzziness is determined by a gap in the countries' scores (as proposed by Schneider &amp; Wagemann, 2012: 37)</p> | <p>Wage coordination (scale from 1 to 5): Under 1.5 is considered fully in the set of uncoordinated union movements</p> <p>Centralisation (scale from 0-1): Under 0.3 is considered fully in the set of fragmented union movements. Veto powers included.</p> | <p><i>Based on weighted average centralisation of trade union movement and degree of wage coordination</i></p> <p><i>Direct method of calibration using the three qualitative anchors and then a weighted average of these two fuzzy-set scores.</i></p> <p><i>Centralization is closest to Elvander's hypothesis, so I weigh centralization 2/3 and wage coordination 1/3 since centralization is measured with ascending formal hierarchical powers, whereas coordination is based on bargaining practices. Elvander focused on structure and governance, so I also consider whether higher levels have veto power over lower level decisions, e.g. to go on strike.</i></p> |
| <i>Strong Unions (STRUN)</i>             | 15 % coverage based on the distribution of coverage among countries. Below this point, only a few pockets of the economy are covered and the most important ones – e.g. manufacturing –                                                                                  | 55 % coverage is the 0.5 threshold for bargaining coverage which is the middle point between one of the largest gaps in the distribution (between                                                                                                                                                                                                                                                   | 90 % coverage based on distribution of coverage among countries. Above this point unions control the regulatory process for the labour market and only certain smaller                                                                                        | <p><i>Based on union density and bargaining coverage</i></p> <p><i>Direct method of calibration using the three qualitative anchors and then weighted average of the fuzzy-set scores.</i></p> <p><i>The key issue for unions is bargaining coverage and I weigh this <math>\frac{3}{4}</math> as compared to union density at <math>\frac{1}{4}</math>. With bargaining coverage, unions can 'punch above their</i></p>                                                                                                                                                                                                                                                       |

|                                                               |                                                                                                                                                                                                                                                                                |                                                                                                                                                                                                                                                                                                                                                                                  |                                                                                                                                                                                                                                           |                                                                                                                                                                                                                                             |
|---------------------------------------------------------------|--------------------------------------------------------------------------------------------------------------------------------------------------------------------------------------------------------------------------------------------------------------------------------|----------------------------------------------------------------------------------------------------------------------------------------------------------------------------------------------------------------------------------------------------------------------------------------------------------------------------------------------------------------------------------|-------------------------------------------------------------------------------------------------------------------------------------------------------------------------------------------------------------------------------------------|---------------------------------------------------------------------------------------------------------------------------------------------------------------------------------------------------------------------------------------------|
|                                                               | <p>will not be covered fully, even in the hypothetical event that all of manufacturing was covered.</p> <p>20 % density based on the distribution of density in Europe. Under this point, unions without statutory help will be too weak to have any real impact, e.g. UK.</p> | <p>Ireland 49.9 % and Luxembourg 59.4 %).</p> <p>40 % union density is the 0.5 threshold for union density. Distribution of union members will in the case of 40 % density become piecemeal in some industries, thus making the overall union movement weak. This threshold is consistent with empirical studies of collective bargaining (e.g. Crouch, 1993; Traxler, 2004.</p> | <p>pockets that are less relevant are left out.</p> <p>60 % union density in a country constitutes a very strong union movement in which the union can comfortably claim to be representative of the labour market across industries.</p> | <p><i>weight' and can do so for many years despite lack of members.</i></p>                                                                                                                                                                 |
| <i>Lax Regulation of Industrial Action (LREGIND)</i>          | If procedural restrictions are all absent and all types of actions are allowed.                                                                                                                                                                                                | If procedural rules are weak but many types of actions are allowed. Or if procedural rules are medium strong by most types are disallowed                                                                                                                                                                                                                                        | If procedural restrictions are all present and all types of action are disallowed.                                                                                                                                                        | <i>Qualitative assessment of formal regulation of different types of procedural restrictions on industrial action and on different types of actions (blockade; boycott; go slow; work to rule; picketing; political; sympathy; warning)</i> |
| <i>Normal Civil Court System in Labour Matters (CIVCOURT)</i> | If specialised labour court with lay judges                                                                                                                                                                                                                                    | If integrated court system with no clear appointment of judges                                                                                                                                                                                                                                                                                                                   | If normal civil court without lay judges                                                                                                                                                                                                  | <i>Qualitative assessment of prevalence of different court systems and presence of lay judges</i>                                                                                                                                           |

## References for data calibration

- Amorós FP. (2006) *EIRO Thematic Feature on collective dispute resolutions in an enlarged European Union - case of Spain*. Dublin: European Foundation for the Improvement of Living and Working Conditions.
- Berg A. (2006) *EIRO Thematic Feature on collective dispute resolutions in an enlarged European Union - case of Sweden*. Dublin: European Foundation for the Improvement of Living and Working Conditions.
- Chaidron A. (2006) *EIRO Thematic Feature on collective dispute resolutions in an enlarged European Union - case of Belgium*. Dublin: European Foundation for the Improvement of Living and Working Conditions.
- de Roo A. (2003a) Labour Conciliation, Mediation and Arbitration in Luxembourg. In: Vald,s Dal-R, F (ed) *Labour Conciliation, Mediation and Arbitration in European Union Countries*. Madrid: Ministerio de Trabajo y Asuntos Sociales, 273-282.
- de Roo A. (2003b) Labour Conciliation, Mediation and Arbitration in the Netherlands. In: Vald,s Dal-R, F (ed) *Labour Conciliation, Mediation and Arbitration in European Union Countries*. Madrid: Ministerio de Trabajo y Asuntos Sociales, 283-300.
- Delattre E. (2003) Labour Conciliation, Mediation and Arbitration in Belgium. In: Vald,s Dal-R, F (ed) *Labour Conciliation, Mediation and Arbitration in European Union Countries*. Madrid: Ministerio de Trabajo y Asuntos Sociales, 67-101.
- Dickens L. (2006) *EIRO Thematic Feature on collective dispute resolutions in an enlarged European Union - case of UK*. Dublin: European Foundation for the Improvement of Living and Working Conditions.
- Dobbins T. (2006) *EIRO Thematic Feature on collective dispute resolutions in an enlarged European Union - case of Ireland*. Dublin: European Foundation for the Improvement of Living and Working Conditions.
- Doherty M. (2011) It must have been love ... but it's over now: the crisis and collapse of social partnership in Ireland. *Transfer: European Review of Labour and Research* 17: 371-385.
- Dribbush H and Stettes O. (2006) *EIRO Thematic Feature on collective dispute resolutions in an enlarged European Union - case of Germany*. Dublin: European Foundation for the Improvement of Living and Working Conditions.
- Due J, Madsen JS and Strøby Jensen C. (1993) *Den Danske Model: En Historisk Sociologisk Analyse af det Kollektive Aftalesystem*, København: Jurist- og Økonomforbundets Forlag.
- EALCJ. (2013) *Labour & Related Courts*. Available at: <http://ealcj.org/labour.html>.
- EIRO. (2006) *EIRO Thematic Feature: Collective dispute resolutions in an enlarged European Union*. Dublin: European Foundation for the Improvement of Living and Working Conditions.
- EIRO. (2013) *EMIRE database*. Available at: <http://www.eurofound.europa.eu/emire/emire.htm>.

- Eriksson K. (2003) Labour Conciliation, Mediation and Arbitration in Sweden. In: Valdés Dal-Ré F (ed) *Labour Conciliation, Mediation and Arbitration in European Union Countries*. Madrid: Ministerio de Trabajo y Asuntos Sociales, 363-378.
- Fluder R and Hotz-Hart B. (1998) Switzerland: Still as Smooth as Clockwork? In: Ferner A and Hyman R (eds) *Changing industrial relations in Europe - 2nd ed*. Oxford: Blackwell Publishers Ltd, 262-282.
- Grandi M. (2003) Labour Conciliation, Mediation and Arbitration in Italy. In: Valdés Dal-Ré F (ed) *Labour Conciliation, Mediation and Arbitration in European Union Countries*. Madrid: Ministerio de Trabajo y Asuntos Sociales, 250-282.
- Iversen T. (1999) *Contested Economic Institutions. The politics of macroeconomics and wage bargaining in advanced democracies*, Cambridge: Cambridge University Press.
- Jacobs A. (1993a) *Conciliation, Mediation and Arbitration in Industrial Disputes in the Countries of Western Europe - Part I. A synopsis of national rules and practices in the countries of Western Europe*. Dublin: European Commission/Irish Labour Relations Commission.
- Jacobs A. (1993b) *Conciliation, Mediation and Arbitration in Industrial Disputes in the Countries of Western Europe - Part II. Synthesis Report*. Dublin: European Commission/Irish Labour Relations Commission.
- Jeammaud A. (2003) Labour Conciliation, Mediation and Arbitration in France. In: Valdés Dal-Ré F (ed) *Labour Conciliation, Mediation and Arbitration in European Union Countries*. Madrid: Ministerio de Trabajo y Asuntos Sociales, 143-168.
- Jørgensen C. (2006) *EIRO Thematic Feature on collective dispute resolutions in an enlarged European Union - case of Denmark*. Dublin: European Foundation for the Improvement of Living and Working Conditions.
- Karkioulafis C. (2006) *EIRO Thematic Feature on collective dispute resolutions in an enlarged European Union - case of Greece*. Dublin: European Foundation for the Improvement of Living and Working Conditions.
- Kerr A. (2003) Labour Conciliation, Mediation and Arbitration in Ireland. In: Valdés Dal-Ré F (ed) *Labour Conciliation, Mediation and Arbitration in European Union Countries*. Madrid: Ministerio de Trabajo y Asuntos Sociales, 231-250.
- Kilpatrick C. (2003) Labour Conciliation, Mediation and Arbitration in United Kingdom. In: Valdés Dal-Ré F (ed) *Labour Conciliation, Mediation and Arbitration in European Union Countries*. Madrid: Ministerio de Trabajo y Asuntos Sociales, 379-404.
- Kristiansen J. (2003) Labour Conciliation, Mediation and Arbitration in Denmark. In: Valdés Dal-Ré F (ed) *Labour Conciliation, Mediation and Arbitration in European Union Countries*. Madrid: Ministerio de Trabajo y Asuntos Sociales, 103-120.
- Kuusisto A. (2006) *EIRO Thematic Feature on collective dispute resolutions in an enlarged European Union - case of Finland*. Dublin: European Foundation for the Improvement of Living and Working Conditions.
- Marhold F. (2003) Labour Conciliation, Mediation and Arbitration in Austria. In: Valdés Dal-Ré F (ed) *Labour Conciliation, Mediation and Arbitration in European Union Countries*. Madrid: Ministerio de Trabajo y Asuntos Sociales, 55-66.

Monteiro Fernandes A. (2003) Labour Conciliation, Mediation and Arbitration in Portugal. In: Valdés Dal-Ré, F (ed) *Labour Conciliation, Mediation and Arbitration in European Union Countries*. Madrid: Ministerio de Trabajo y Asuntos Sociales, 301-362.

Pernot JM and Vincent C. (2006) *EIRO Thematic Feature on collective dispute resolutions in an enlarged European Union - case of France*. Dublin: European Foundation for the Improvement of Living and Working Conditions.

Rodríguez Fernández A. (2003) Labour Conciliation, Mediation and Arbitration in Spain. In: Valdés Dal-Ré, F (ed) *Labour Conciliation, Mediation and Arbitration in European Union Countries*. Madrid: Ministerio de Trabajo y Asuntos Sociales, 317-362.

Salonius J. (2003) Labour Conciliation, Mediation and Arbitration in Finland. In: Valdés Dal-Ré, F (ed) *Labour Conciliation, Mediation and Arbitration in European Union Countries*. Madrid: Ministerio de Trabajo y Asuntos Sociales, 121-142.

Senatori I. (2006) *EIRO Thematic Feature on collective dispute resolutions in an enlarged European Union - case of Italy*. Dublin: European Foundation for the Improvement of Living and Working Conditions.

Stokke TA. (1998) *Lønnsforhandlinger og konfliktløsning*, Oslo: FAFO.

Stokke TA. (2002) Conflict regulation in the Nordic countries. *Transfer* 8: 670-687.

Stokke TA. (2006) *EIRO Thematic Feature on collective dispute resolutions in an enlarged European Union - case of Norway*. Dublin: European Foundation for the Improvement of Living and Working Conditions.

Strohmer S. (2006) *EIRO Thematic Feature on collective dispute resolutions in an enlarged European Union - case of Austria*. Dublin: European Foundation for the Improvement of Living and Working Conditions.

Valdés Dal-Ré V. (2003) *Labour conciliation, mediation and arbitration in European Union countries*. Madrid: Ministerio de Trabajo y Asuntos Sociales.

van het Kaar R. (2006) *EIRO Thematic Feature on collective dispute resolutions in an enlarged European Union - case of the Netherlands*. Dublin: European Foundation for the Improvement of Living and Working Conditions.

Visser J. (2011a) *Data Base on Institutional Characteristics of Trade Unions, Wage Setting, State Intervention and Social Pacts, 1960-2010 (ICTWSS) - Codebook*. University of Amsterdam: Amsterdam Institute for Advanced Labour Studies AIAS.

Visser J. (2011b) *ICTWSS database 3.0*. In: <http://www.uva-aias.net/208> (ed). Amsterdam.

Warneck W. (2007) *Strike rules in the EU27 and beyond - A comparative overview*. Brussels: ETUI.

Yannakourou M and Koukoulos G. (2003) Labour Conciliation, Mediation and Arbitration in Greece. In: Valdés Dal-Ré, F (ed) *Labour Conciliation, Mediation and Arbitration in European Union Countries*. Madrid: Ministerio de Trabajo y Asuntos Sociales, 195-230.

Zachert U. (2003) Labour Conciliation, Mediation and Arbitration in Germany. In: Valdés Dal-Ré F (ed) *Labour Conciliation, Mediation and Arbitration in European Countries*. Madrid: Ministerio de Trabajo y Asuntos Sociales, 171-194.
